# Supplementary material for: Digital resilience monitoring of informal caregivers of persons with dementia for early detection of overburden: Development and pilot testing
Source: PubMed Central journal article supplement — Int J Geriatr Psychiatry. 2023 Jan 24;38(1):e5869. doi: 10.1002/gps.5869 (PMC10108106; doi:10.1002/gps.5869), 2023-01-24
Supplement: GPS-38-0-s001.pdf [file GPS-38-0-s001.pdf]

**APPENDIX A1** – Dominant background of experts.

| <b>Dominant background</b>       | <b>Number, n</b> |
|----------------------------------|------------------|
| Application developer            | 1                |
| Innovation expert                | 2                |
| Geriatrician/ researcher         | 1                |
| General practitioner/ researcher | 1                |
| Researcher                       | 2                |
